# Supplementary material for: Cocoa particles for food emulsion stabilisation
Source: Royal Society of Chemistry journal article supplement (doi:10.1039/c3fo30181h), 2013-01-01
Supplement: c3fo30181h.pdf [file c3fo30181h.pdf]

## ESI

Surface area and volume based mean particle diameters  $d_{3,2}$  and  $d_{4,3}$ , respectively, of the cocoa particles used in this research. Too little of CP3(1;e) was available to conduct particle sizing and cocoa mass (CM(54)) does not lend itself to the particle sizing employed.

| Sample code  | $d_{3,2}$ ( $\mu\text{m}$ ) | $d_{4,3}$ ( $\mu\text{m}$ ) |
|--------------|-----------------------------|-----------------------------|
| CP1(1)       | $5.1 \pm 0.3$               | $18.2 \pm 2.3$              |
| CP2(1)       | $4.1 \pm 0.1$               | $9.6 \pm 1.2$               |
| CP3(1;e)     | -                           | -                           |
| CP4(11)      | $4.6 \pm 0.1$               | $11.4 \pm 0.6$              |
| CP5(10-12)   | $4.2 \pm 0.0$               | $10.7 \pm 0.4$              |
| CP6(10-12)   | $4.3 \pm 0.1$               | $11.1 \pm 0.9$              |
| CP7(10-12)   | $4.5 \pm 0.1$               | $10.3 \pm 0.4$              |
| CP8(10-12)   | $4.9 \pm 0.2$               | $10.5 \pm 0.3$              |
| CP9(10-12;n) | $3.1 \pm 0.3$               | $10.3 \pm 0.2$              |
| CP10(20-22)  | $4.48 \pm 0.1$              | $14.3 \pm 0.8$              |
| CM(54)       | -                           | -                           |
| CF(5)        | $8.3 \pm 0.3$               | $32.5 \pm 1.6$              |

10

Mean droplet diameter of emulsions formed with CP5(10-12) at different concentrations measured 1 and 13 days after processing and storage at 20°C (average values  $\pm$  1 standard deviation).

| Cocoa particle concentration (% w/w) | $d_{3,2}$ ( $\mu\text{m}$ ) |               | $d_{4,3}$ ( $\mu\text{m}$ ) |                |
|--------------------------------------|-----------------------------|---------------|-----------------------------|----------------|
|                                      | Day 1                       | Day 13        | Day 1                       | Day 13         |
| 6                                    | $5.4 \pm 0.1$               | $5.1 \pm 0.2$ | $20.6 \pm 0.4$              | $19.4 \pm 1.4$ |
| 8                                    | $5.2 \pm 0.3$               | $5.0 \pm 0.2$ | $19.1 \pm 1.8$              | $18.5 \pm 0.9$ |
| 10                                   | $5.2 \pm 0.1$               | $4.8 \pm 0.1$ | $18.6 \pm 0.4$              | $17.4 \pm 0.3$ |

Surface area based mean droplet diameters of emulsions formed with varying sources of cocoa particles followed over 100 days of storage at 20°C.

| Cocoa powder | $d_{3,2}$ ( $\mu\text{m}$ ) |                |                |                |
|--------------|-----------------------------|----------------|----------------|----------------|
|              | Day 1                       | Day 6          | Day 31         | Day 100        |
| CP1(1)       | $5.8 \pm 0.1$               | $5.5 \pm 0.1$  | $5.4 \pm 0.2$  | $5.5 \pm 0.4$  |
| CP2(1)       | $5.7 \pm 0.1$               | $5.2 \pm 0.3$  | $4.8 \pm 0.2$  | $4.9 \pm 0.1$  |
| CP3(1;e)     | $9.5 \pm 0.6$               | $9.0 \pm 0.3$  | $10.9 \pm 0.3$ | $10.2 \pm 0.2$ |
| CP4(11)      | $5.7 \pm 0.2$               | $5.4 \pm 0.4$  | $5.6 \pm 0.4$  | $5.5 \pm 0.4$  |
| CP5(10-12)   | $4.7 \pm 0.1$               | $4.5 \pm 0.2$  | $4.4 \pm 0.1$  | $4.4 \pm 0.7$  |
| CP6(10-12)   | $6.0 \pm 0.3$               | $6.0 \pm 0.4$  | $5.0 \pm 0.2$  | $5.6 \pm 0.5$  |
| CP7(10-12)   | $5.6 \pm 0.2$               | $5.5 \pm 0.2$  | $5.5 \pm 0.2$  | $5.2 \pm 0.1$  |
| CP8(10-12)   | $5.3 \pm 0.1$               | $5.2 \pm 0.1$  | $5.0 \pm 0.1$  | $5.0 \pm 0.7$  |
| CP9(10-12;n) | $5.1 \pm 0.1$               | $4.9 \pm 0.3$  | $4.6 \pm 0.2$  | $4.5 \pm 0.2$  |
| CP10(20-22)  | $5.9 \pm 0.2$               | $5.5 \pm 0.0$  | $4.8 \pm 0.1$  | $5.6 \pm 0.3$  |
| CM(54)       | $10.7 \pm 0.4$              | $10.8 \pm 0.4$ | $8.3 \pm 0.8$  | $9.9 \pm 0.7$  |
| CF(5)        | $8.7 \pm 0.3$               | $8.5 \pm 0.3$  | $8.2 \pm 0.1$  | $8.1 \pm 0.3$  |

25

Volume based mean droplet diameters of emulsions formed with varying sources of cocoa particles followed over 100 days of storage at 20°C.

| Cocoa powder | $d_{4,3}$ ( $\mu\text{m}$ ) |                |                |                |
|--------------|-----------------------------|----------------|----------------|----------------|
|              | Day 1                       | Day 6          | Day 31         | Day 100        |
| CP1(1)       | $21.4 \pm 0.8$              | $20.1 \pm 0.7$ | $19.3 \pm 1.5$ | $22.4 \pm 3.9$ |
| CP2(1)       | $21.4 \pm 0.8$              | $18.9 \pm 2.2$ | $15.6 \pm 0.9$ | $15.9 \pm 0.7$ |
| CP3(1;e)     | $55.2 \pm 2.9$              | $54.2 \pm 2.1$ | $79.9 \pm 5.2$ | $83.7 \pm 2.2$ |
| CP4(11)      | $23.0 \pm 1.9$              | $22.9 \pm 2.3$ | $23.7 \pm 1.4$ | $26.9 \pm 3.3$ |
| CP5(10-12)   | $15.3 \pm 0.5$              | $14.6 \pm 0.9$ | $14.3 \pm 0.5$ | $19.6 \pm 3.0$ |
| CP6(10-12)   | $23.5 \pm 2.6$              | $26.9 \pm 3.6$ | $18.3 \pm 1.8$ | $26.7 \pm 5.8$ |
| CP7(10-12)   | $20.8 \pm 1.8$              | $21.5 \pm 1.2$ | $21.2 \pm 2.1$ | $20.5 \pm 0.5$ |
| CP8(10-12)   | $18.9 \pm 0.9$              | $19.2 \pm 0.4$ | $18.2 \pm 0.7$ | $23.4 \pm 7.6$ |
| CP9(10-12;n) | $17.9 \pm 0.4$              | $17.5 \pm 3.7$ | $15.4 \pm 1.8$ | $18.0 \pm 1.1$ |
| CP10(20-22)  | $24.5 \pm 1.5$              | $26.5 \pm 2.2$ | $21.6 \pm 0.7$ | $33.1 \pm 6.0$ |
| CM(54)       | $56.0 \pm 2.7$              | $61.7 \pm 0.9$ | $56.1 \pm 3.5$ | $85.4 \pm 7.4$ |
| CF(5)        | $38.9 \pm 1.4$              | $38.7 \pm 4.5$ | $35.8 \pm 0.2$ | $35.5 \pm 1.4$ |

30

Characteristic particle diameters acquired 1 and 15 days after emulsification at different pH values.

| pH   | $d_{3,2}$ ( $\mu\text{m}$ ) |               | $d_{4,3}$ ( $\mu\text{m}$ ) |                |
|------|-----------------------------|---------------|-----------------------------|----------------|
|      | Day 1                       | Day 15        | Day 1                       | Day 15         |
| 0    | $7.1 \pm 0.1$               | $6.8 \pm 0.2$ | $44.2 \pm 1.5$              | $39.0 \pm 1.0$ |
| 1.5  | $7.2 \pm 0.1$               | $6.7 \pm 0.1$ | $34.8 \pm 0.8$              | $31.6 \pm 1.4$ |
| 6    | $5.7 \pm 0.3$               | $5.2 \pm 0.2$ | $22.4 \pm 2.0$              | $21.8 \pm 2.1$ |
| 10.5 | $5.6 \pm 0.3$               | $5.3 \pm 0.2$ | $21.3 \pm 2.0$              | $21.3 \pm 1.5$ |
| 12   | $5.3 \pm 0.3$               | $5.0 \pm 0.2$ | $20.2 \pm 0.8$              | $19.0 \pm 1.0$ |

Light micrographs of emulsions stabilised with CP 10 (20-22) acquired after 1 day of storage at 20°C: A) Washed cocoa particle, B) control emulsion.

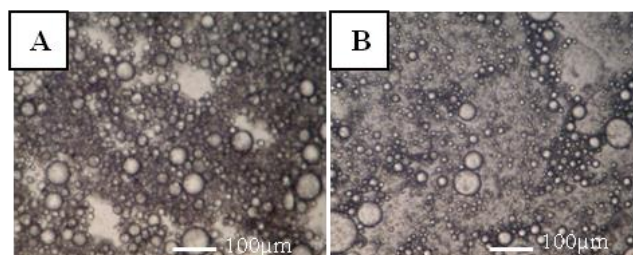

45
